# Supplementary material
Source: Springer Nature journal article supplement (https://www.springermedizin.de/resource/supplementary/12889_2009_1580_MOESM1_ESM.pdf/9503480)
Supplement: MOESM1 [file 9503480]

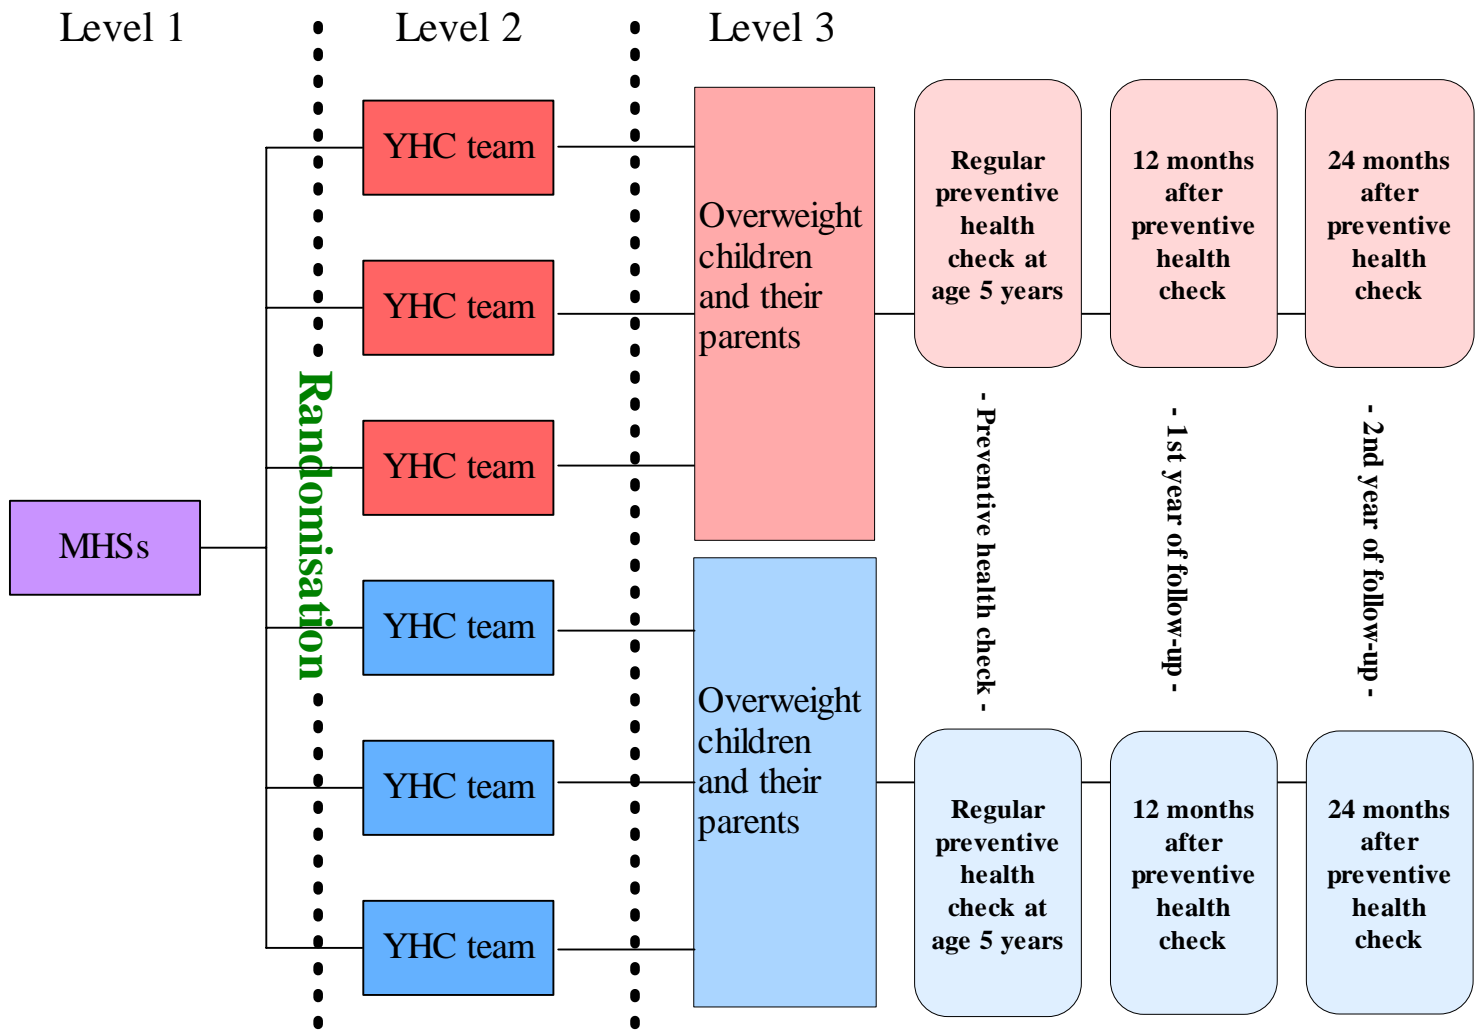

**Legend:**

- Red boxes → Intervention group, teams offer prevention protocol
- Blue boxes → Control group, teams offer usual care
